# Supplementary material
Source: PubMed Central journal article supplement (PMC6177579)
Supplement: supp_RA118.004425_138766_1_supp_176673_pcwxjw.pdf [file supp_RA118.004425_138766_1_supp_176673_pcwxjw.pdf]

### Supporting information.

**Fig. S1** The kinetics of the FolC-catalyzed reaction were measured as a function of the aminopterin concentration (0 to 0.5 mM) at an L-glutamate concentration of 5 mM in the presence of GlnD (squares) or its absence (circles).

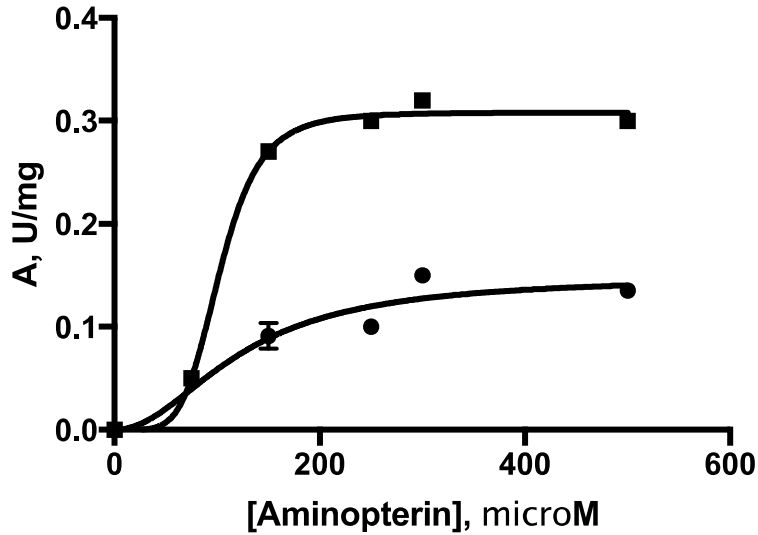

**Fig. S2** The effect of L-glutamine (circles) and addition of 1.5 mM  $\alpha$ -KG (triangles) on GlnD dependent activation of FolC.

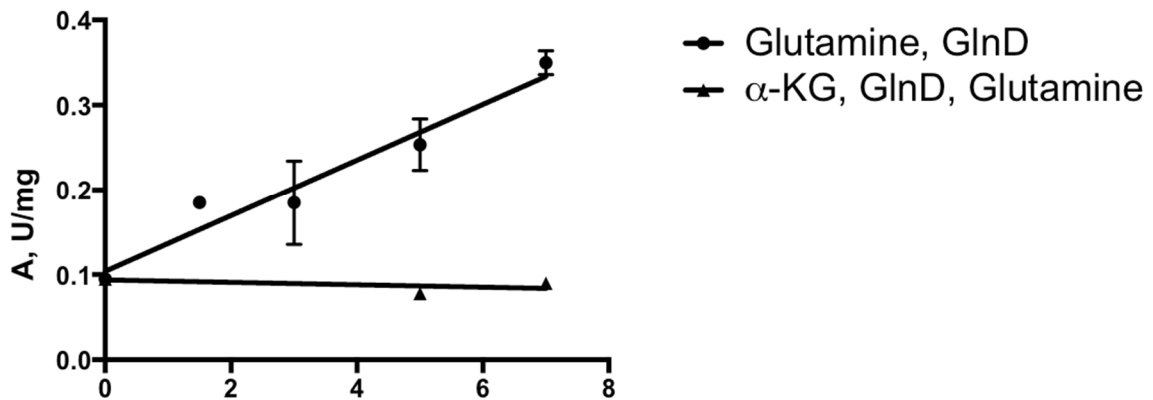

**Table S1.** The interacting residues in the model (FolC-Ugd, FolC-MnmE)

| Interacting pair | FolC interface                                                                                                                    | Ugd interface                                                                                                          | MnmE interface                                                                          |
|------------------|-----------------------------------------------------------------------------------------------------------------------------------|------------------------------------------------------------------------------------------------------------------------|-----------------------------------------------------------------------------------------|
| <b>FolC-Ugd</b>  | 19, 21, 22, 23, 24, 25, 26, 27, 28, 172, 173, 175, 176, 334, 335, 336, 337, 358, 359, 360, 361, 362, 364, 366, 375, 377, 379, 380 | 157, 163, 192, 199, 203, 207, 210, 214, 217, 221, 227, 228, 231, 232, 235, 236, 237, 238, 265, 268, 269, 271, 272, 273 |                                                                                         |
| <b>FolC-MnmE</b> | 36, 171, 174, 175, 179, 181, 228, 230, 314, 315, 334, 335, 337, 339, 343, 344, 346, 347, 360, 361, 362, 370, 371                  |                                                                                                                        | 27, 44, 68, 70, 71, 75, 117, 118, 119, 120, 125, 149, 150, 157, 158, 160, 161, 176, 437 |

**Table S2.** List of gene pairs with genetic interaction scores in the rich and minimal media growth conditions.

| Bioprocesses         | Mutant 1 | Mutant 2 | GI score from rich media (Cell envelope study:(1)) | GI score from minimal media (Cell envelope study: (1)) |
|----------------------|----------|----------|----------------------------------------------------|--------------------------------------------------------|
| Carbon metabolism    | folC     | accB     | -3.40167                                           | ---                                                    |
|                      | ugd      | accB     | -20.0000002                                        | -20.0000001                                            |
|                      | folC     | accC     | -20.0000002                                        | ---                                                    |
|                      | ugd      | accC     | -20.0000002                                        | -20.0000001                                            |
|                      | ugd      | ackA     | -6.68861                                           | ---                                                    |
|                      | ugd      | pta      | ---                                                | -20.0000001                                            |
|                      | ugd      | fadB     | -3.06252                                           | -3.42229                                               |
|                      | ugd      | folD     | -4.45695                                           | -20.0000001                                            |
|                      | ugd      | frdB     | -6.93152                                           | ---                                                    |
|                      | ugd      | frdC     | -20.0000002                                        | -20.0000001                                            |
|                      | folC     | frdD     | -20.0000002                                        | ---                                                    |
|                      | ugd      | frdD     | -9.49324                                           | ---                                                    |
| Folate biosynthesis  | folC     | folM     | 2.39719                                            | ---                                                    |
|                      | ugd      | folA     | 2.13185                                            | ---                                                    |
|                      | folC     | pabC     | 3.97176                                            | ---                                                    |
| Glutamate Metabolism | folC     | purB     | 2.34572                                            | ---                                                    |
|                      | ugd      | glmS     | ---                                                | 2.92707                                                |

1. Babu, M., Diaz-Mejia, J. J., Vlasblom, J., Gagarinova, A., Phanse, S., Graham, C., Yousif, F., Ding, H., Xiong, X., Nazarians-Armavil, A., Alamgir, M., Ali, M., Pogoutse, O., Pe'er, A., Arnold, R., Michaut, M., Parkinson, J., Golshani, A., Whitfield, C., Wodak, S. J., Moreno-Hagelsieb, G., Greenblatt, J. F., and Emili, A. (2011) Genetic interaction maps in *Escherichia coli* reveal functional crosstalk among cell envelope biogenesis pathways. *PLoS Genet* 7, e1002377
